# Supplementary material for: Screening for Lipid-Metabolism-Related Genes and Identifying the Diagnostic Potential of ANGPTL6 for HBV-Related Early-Stage Hepatocellular Carcinoma
Source: MDPI journal article supplement (doi:10.3390/biom12111700), 2022-11-17
Supplement: s1 [file s1]

**Table S3.** KEGG pathway and biological process enrichment analyses of down-regulated DEGs.

| Term               | Description                              | Gene Count | <i>p</i> -Value | FDR      |
|--------------------|------------------------------------------|------------|-----------------|----------|
| KEGG Pathway       |                                          |            |                 |          |
| hsa01100           | Metabolic pathways                       | 151        | 7.72e-19        | 2.09e-16 |
| hsa04610           | Complement and coagulation cascades      | 29         | 1.99e-16        | 2.70e-14 |
| hsa00830           | Retinol metabolism                       | 21         | 5.00e-11        | 4.48e-09 |
| Biological Process |                                          |            |                 |          |
| KW-0443            | Lipid metabolism                         | 84         | 8.12e-21        | 7.80e-19 |
| KW-0180            | Complement pathway                       | 14         | 3.46e-11        | 1.66e-09 |
| KW-0276            | Fatty acid metabolism                    | 28         | 8.59e-11        | 2.75e-09 |
| GO: 0008202        | Steroid metabolic process                | 21         | 1.98e-16        | 6.36e-13 |
| GO: 0.006805       | Xenobiotic metabolic process             | 26         | 1.45e-15        | 2.33e-12 |
| GO: 0.006958       | Complement activation, classical pathway | 28         | 7.72e-15        | 8.26e-12 |

*Abbreviations:* KEGG, Kyoto Encyclopedia of Genes and Genomes; KW, Keywords; GO, Gene Ontology; DEGs, differentially expressed genes; FDR, false discovery rate.
