# Supplementary material for: Screening for Lipid-Metabolism-Related Genes and Identifying the Diagnostic Potential of ANGPTL6 for HBV-Related Early-Stage Hepatocellular Carcinoma
Source: MDPI journal article supplement (doi:10.3390/biom12111700), 2022-11-17
Supplement: s1 [file s1]

**Table S10.** Characteristics of early primary HCC patients and the noncancer group with normal serum AFP levels.

| Characteristics                        | HCC Patients               | The noncancer group       | <i>p</i> -Value |
|----------------------------------------|----------------------------|---------------------------|-----------------|
| Case                                   | 32                         | 62                        | -               |
| Age (years), Mean $\pm$ SD             | 61.22 $\pm$ 9.69           | 62.50 $\pm$ 10.59         | 0.569           |
| Male, <i>n</i> (%)                     | 29 (90.63)                 | 56 (90.32)                | 0.962           |
| HBsAg Positive, <i>n</i> (%)           | 32 (100)                   | 30 (48.39)                | < 0.001         |
| HCV-Ab Positive, <i>n</i> (%)          | 0 (0)                      | 0 (0)                     | -               |
| HEV-IgM Positive, <i>n</i> (%)         | 0 (0)                      | 0 (0)                     | -               |
| BMI (kg/m <sup>2</sup> ), Median (IQR) | 24.25 (23.73 to 25.28)     | 24.30 (23.35 to 24.93)    | 0.303           |
| ALT (U/L), Median (IQR)                | 23.00 (14.25 to 31.50)     | 22.00 (17.75 to 34.00)    | 0.768           |
| AST (U/L), Median (IQR)                | 26.00 (20.25 to 31.75)     | 23.00 (18.00 to 28.00)    | 0.063           |
| TBIL ( $\mu$ mol/L), Median (IQR)      | 14.80 (10.15 to 20.03)     | 13.55 (11.40 to 20.05)    | 0.968           |
| ALB (g/L), Median (IQR)                | 42.80 (41.15 to 44.95)     | 44.60 (40.98 to 46.75)    | 0.171           |
| CREA ( $\mu$ mol/L), Median (IQR)      | 68.50 (59.25 to 79.50)     | 69.50 (65.00 to 78.50)    | 0.587           |
| AFP (ng/mL), Median (IQR)              | 3.16 (2.26 to 4.53)        | 2.48 (1.71 to 3.54)       | 0.028           |
| ANGPTL6 (pg/mL), Median (IQR)          | 582.10 (385.88 to 1309.13) | 399.18 (181.34 to 497.48) | 0.001           |

The noncancer group had a total of 30 CHB patients and 32 HCs.
