# Supplementary material for: Screening for Lipid-Metabolism-Related Genes and Identifying the Diagnostic Potential of ANGPTL6 for HBV-Related Early-Stage Hepatocellular Carcinoma
Source: MDPI journal article supplement (doi:10.3390/biom12111700), 2022-11-17
Supplement: s1 [file s1]

**Table S8.** Characteristics of HCs and early primary HCC patients with normal serum AFP levels.

| Characteristics                        | HCC Patients               | HCs                      | <i>p</i> -Value |
|----------------------------------------|----------------------------|--------------------------|-----------------|
| Case                                   | 32                         | 32                       | -               |
| Age (years), Mean $\pm$ SD             | 61.22 $\pm$ 9.69           | 65.75 $\pm$ 9.67         | 0.066           |
| Male, <i>n</i> (%)                     | 29 (90.63)                 | 30 (93.75)               | 0.641           |
| HBsAg Positive, <i>n</i> (%)           | 32 (100)                   | 0 (0)                    | -               |
| HCV-Ab Positive, <i>n</i> (%)          | 0 (0)                      | 0 (0)                    | -               |
| HEV-IgM Positive, <i>n</i> (%)         | 0 (0)                      | 0 (0)                    | -               |
| BMI (kg/m <sup>2</sup> ), Median (IQR) | 24.25 (23.73 to 25.28)     | 24.30 (23.80 to 25.05)   | 0.957           |
| ALT (U/L), Median (IQR)                | 23.00 (14.25 to 31.50)     | 22.50 (18.00 to 33.00)   | 0.747           |
| AST (U/L), Median (IQR)                | 26.00 (20.25 to 31.75)     | 23.00 (20.00 to 25.00)   | 0.053           |
| TBIL ( $\mu$ mol/L), Median (IQR)      | 14.80 (10.15 to 20.03)     | 13.35 (11.68 to 14.15)   | 0.383           |
| ALB (g/L), Median (IQR)                | 42.80 (41.15 to 44.95)     | 46.00 (43.43 to 47.45)   | 0.001           |
| CREA ( $\mu$ mol/L), Median (IQR)      | 68.50 (59.25 to 79.50)     | 75.50 (67.25 to 81.50)   | 0.183           |
| AFP (ng/mL), Median (IQR)              | 3.16 (2.26 to 4.53)        | 2.51 (1.67 to 3.45)      | 0.063           |
| ANGPTL6 (pg/mL), Median (IQR)          | 582.10 (385.88 to 1309.13) | 191.00 (99.80 to 519.50) | 0.001           |
