# Supplementary material for: Screening for Lipid-Metabolism-Related Genes and Identifying the Diagnostic Potential of ANGPTL6 for HBV-Related Early-Stage Hepatocellular Carcinoma
Source: MDPI journal article supplement (doi:10.3390/biom12111700), 2022-11-17
Supplement: s1 [file s1]

**Table S7.** Characteristics of early primary HCC patients.

| Characteristics                        | HCC Patients         |
|----------------------------------------|----------------------|
| Case, <i>n</i>                         | 51                   |
| Age (years), Mean $\pm$ SD             | 60.78 $\pm$ 9.11     |
| Male, <i>n</i> (%)                     | 47 (92.16)           |
| Tumor size (cm)                        |                      |
| $\geq$ 3 cm, <i>n</i> (%)              | 30 (58.82)           |
| < 3 cm, <i>n</i> (%)                   | 21 (41.18)           |
| < 2 cm, <i>n</i> (%)                   | 11 (21.57)           |
| < 1 cm, <i>n</i> (%)                   | 2 (3.92)             |
| Tumor Location in Couinaud's Segment   |                      |
| I, <i>n</i> (%)                        | 3 (5.88)             |
| II, <i>n</i> (%)                       | 4 (7.84)             |
| III, <i>n</i> (%)                      | 2 (3.92)             |
| IV, <i>n</i> (%)                       | 5 (9.80)             |
| V, <i>n</i> (%)                        | 8 (15.69)            |
| VI, <i>n</i> (%)                       | 8 (15.69)            |
| VII, <i>n</i> (%)                      | 13 (25.50)           |
| VIII, <i>n</i> (%)                     | 4 (7.84)             |
| II and IV, <i>n</i> (%)                | 1 (1.96)             |
| VI and VII, <i>n</i> (%)               | 2 (3.92)             |
| VII and VIII, <i>n</i> (%)             | 1 (1.96)             |
| Differentiation Degree                 |                      |
| Well, <i>n</i> (%)                     | 5 (9.80)             |
| Moderate, <i>n</i> (%)                 | 25 (49.02)           |
| Poor, <i>n</i> (%)                     | 21 (41.18)           |
| Child-Push Class                       |                      |
| A, <i>n</i> (%)                        | 47 (92.16)           |
| B, <i>n</i> (%)                        | 4 (7.84)             |
| Cirrhosis, <i>n</i> (%)                | 35 (68.63)           |
| BCLC Stage                             |                      |
| Stage 0, <i>n</i> (%)                  | 5 (9.80)             |
| Stage A, <i>n</i> (%)                  | 46 (90.20)           |
| HBsAg Positive, <i>n</i> (%)           | 51 (100)             |
| HCV-Ab Positive, <i>n</i> (%)          | 0 (0)                |
| HEV-IgM Positive, <i>n</i> (%)         | 0 (0)                |
| BMI (kg/m <sup>2</sup> ), Median (IQR) | 24.1 (23.7 to 24.8)  |
| ALT (U/L), Median (IQR)                | 24.0 (19.0 to 35.0)  |
| AST (U/L), Median (IQR)                | 26.0 (21.0 to 33.0)  |
| TBIL ( $\mu$ mol/L), Median (IQR)      | 15.2 (11.0 to 21.7)  |
| ALB (g/L), Median (IQR)                | 42.8 (41.0 to 45.0)  |
| PT (sec), Median (IQR)                 | 11.5 (11.0 to 11.9)  |
| CREA ( $\mu$ mol/L), Median (IQR)      | 69.0 (59.0 to 80.0)  |
| AFP (ng/mL), Median (IQR)              | 4.74 (3.02 to 28.27) |

|                               |            |
|-------------------------------|------------|
| AFP > 7 ng/mL, <i>n</i> (%)   | 19 (37.25) |
| AFP > 20 ng/mL, <i>n</i> (%)  | 15 (29.41) |
| AFP > 200 ng/mL, <i>n</i> (%) | 7 (13.73)  |
| AFP > 400 ng/mL, <i>n</i> (%) | 6 (11.76)  |

---

*Abbreviations:* SD, standard deviation; IQR, interquartile range.
