# Supplementary material for: Screening for Lipid-Metabolism-Related Genes and Identifying the Diagnostic Potential of ANGPTL6 for HBV-Related Early-Stage Hepatocellular Carcinoma
Source: MDPI journal article supplement (doi:10.3390/biom12111700), 2022-11-17
Supplement: s1 [file s1]

**Table S2.** KEGG pathway and biological process enrichment analyses of up-regulated DEGs.

| Term               | Description                         | Gene Count | <i>p</i> -Value | FDR      |
|--------------------|-------------------------------------|------------|-----------------|----------|
| KEGG Pathway       |                                     |            |                 |          |
| hsa04110           | Cell cycle                          | 29         | 2.63e-19        | 7.19e-17 |
| hsa03030           | DNA replication                     | 12         | 7.07e-10        | 9.65e-08 |
| hsa04115           | p53 signaling pathway               | 10         | 8.41e-5         | 0.008    |
| Biological Process |                                     |            |                 |          |
| KW-0131            | Cell cycle                          | 88         | 1.07e-35        | 1.02e-33 |
| KW-0132            | Cell division                       | 65         | 7.53e-31        | 3.58e-29 |
| KW-0498            | Mitosis                             | 54         | 2.50e-29        | 7.93e-28 |
| GO: 0051301        | Cell division                       | 58         | 4.07e-29        | 9.61e-26 |
| GO: 0007094        | Mitotic spindle assembly checkpoint | 15         | 4.98e-15        | 5.88e-12 |
| GO: 0007052        | Mitotic spindle organization        | 17         | 1.46e-13        | 1.15e-10 |

*Abbreviations:* KEGG, Kyoto Encyclopedia of Genes and Genomes; KW, Keywords; GO, Gene Ontology; DEGs, differentially expressed genes; FDR, false discovery rate.
