# Supplementary material for: Screening for Lipid-Metabolism-Related Genes and Identifying the Diagnostic Potential of ANGPTL6 for HBV-Related Early-Stage Hepatocellular Carcinoma
Source: MDPI journal article supplement (doi:10.3390/biom12111700), 2022-11-17
Supplement: s1 [file s1]

**Table S13.** Correlation analysis of serum ANGPTL6 and selected lipoprotein subfractions in patients with early-stage HCC.

| Index | Spearman's r | <i>p</i> |
|-------|--------------|----------|
| TPCH  | 0.256        | 0.197    |
| TPTG  | -0.182       | 0.364    |
| HDCH  | 0.478*       | 0.012    |
| TPA1  | 0.509**      | 0.007    |
| TPA2  | -0.121       | 0.546    |
| TPAB  | -0.176       | 0.380    |
| TBPN  | -0.176       | 0.380    |
| VLPN  | -0.216       | 0.279    |
| L1PN  | 0.109        | 0.590    |
| L2PN  | 0.441*       | 0.021    |
| L5PN  | -0.483*      | 0.011    |
| L6PN  | -0.120       | 0.550    |
| IDTG  | -0.015       | 0.940    |
| VLTG  | -0.194       | 0.332    |
| VLCH  | 0.040        | 0.844    |
| IDCH  | -0.134       | 0.506    |
| VLFC  | 0.085        | 0.673    |
| IDFC  | -0.163       | 0.417    |
| HDFC  | 0.440*       | 0.022    |
| VLPL  | 0.063        | 0.755    |
| IDPL  | 0.134        | 0.504    |
| HDPL  | 0.579**      | 0.002    |
| HDA1  | 0.529**      | 0.005    |
| HDA2  | -0.351       | 0.073    |
| VLAB  | -0.216       | 0.279    |
| VITG  | -0.277       | 0.162    |

|      |         |       |
|------|---------|-------|
| V2TG | -0.142  | 0.481 |
| V3TG | 0.047   | 0.816 |
| V4TG | 0.033   | 0.870 |
| V5TG | 0.059   | 0.769 |
| V1CH | -0.071  | 0.726 |
| V2CH | -0.079  | 0.694 |
| V3CH | 0.080   | 0.691 |
| V4CH | 0.148   | 0.463 |
| V5CH | 0.346   | 0.077 |
| V1FC | 0.152   | 0.449 |
| V2FC | -0.265  | 0.182 |
| V3FC | 0.053   | 0.795 |
| V4FC | 0.002   | 0.993 |
| V5FC | 0.049   | 0.808 |
| V1PL | -0.162  | 0.418 |
| V2PL | -0.031  | 0.880 |
| V3PL | 0.154   | 0.442 |
| V4PL | 0.100   | 0.619 |
| L2TG | 0.121   | 0.549 |
| L3TG | 0.082   | 0.683 |
| L5TG | -0.227  | 0.256 |
| L6TG | -0.204  | 0.307 |
| L1CH | 0.085   | 0.675 |
| L2CH | 0.462*  | 0.015 |
| L5CH | -0.328  | 0.094 |
| L6CH | -0.167  | 0.406 |
| L4FC | -0.439* | 0.022 |
| L5FC | -0.415* | 0.032 |
| L6FC | -0.120  | 0.552 |

|      |          |       |
|------|----------|-------|
| L1PL | 0.110    | 0.585 |
| L2PL | 0.468*   | 0.014 |
| L5PL | -0.386*  | 0.047 |
| L6PL | -0.150   | 0.456 |
| L1AB | 0.109    | 0.590 |
| L2AB | 0.441*   | 0.021 |
| L5AB | -0.483*  | 0.011 |
| L6AB | -0.120   | 0.550 |
| H2CH | 0.514**  | 0.006 |
| H3CH | 0.070    | 0.728 |
| H4CH | -0.173   | 0.389 |
| H1FC | 0.473*   | 0.013 |
| H2FC | 0.402*   | 0.037 |
| H3FC | 0.248    | 0.212 |
| H4FC | -0.080   | 0.691 |
| H3PL | 0.010    | 0.961 |
| H4PL | -0.132   | 0.512 |
| H3A1 | 0.085    | 0.673 |
| H4A1 | -0.076   | 0.705 |
| H3A2 | -0.373   | 0.055 |
| H4A2 | -0.501** | 0.008 |

---

\* $p < 0.05$  (2-sided) and Spearman's  $r > 0.3$  or  $< -0.3$  were considered to be statistically significant correlations. \*\* $p < 0.01$  (2-sided) and Spearman's  $r > 0.3$  or  $< -0.3$  were considered to be statistically significant correlations. The lipoprotein subfractions are annotated in Table S12.
