# Supplementary material for: Screening for Lipid-Metabolism-Related Genes and Identifying the Diagnostic Potential of ANGPTL6 for HBV-Related Early-Stage Hepatocellular Carcinoma
Source: MDPI journal article supplement (doi:10.3390/biom12111700), 2022-11-17
Supplement: s1 [file s1]

**Table S6.** Correlation analysis of the expression of 10 DEGs with the infiltration level of six immune cell types in HCC.

| Genes          | B Cells         |                     | CD8+ T Cells    |                     | CD4+ T Cells    |                     | Macrophages     |                     | Neutrophils     |                     | Dendritic Cells |                     |
|----------------|-----------------|---------------------|-----------------|---------------------|-----------------|---------------------|-----------------|---------------------|-----------------|---------------------|-----------------|---------------------|
|                | <i>p</i> -Value | Partial Correlation |
| <i>ADH4</i>    | 2.82e-08        | -0.294              | 1.52e-04        | -0.203              | 1.72e-04        | -0.201              | 1.43e-08        | -0.301              | 2.30e-05        | -0.226              | 1.91e-05        | -0.230              |
| <i>ANGPTL6</i> | 1.35e-04        | -0.204              | 0.024           | -0.122              | 0.902           | 0.007               | 0.119           | -0.085              | 0.496           | -0.037              | 0.114           | -0.086              |
| <i>CLEC4G</i>  | 0.477           | 0.038               | 0.110           | 0.086               | 0.009           | 0.142               | 8.78e-05        | 0.211               | 0.086           | 0.092               | 0.174           | 0.074               |
| <i>CLEC4M</i>  | 0.702           | 0.021               | 0.538           | 0.033               | 0.129           | 0.082               | 0.345           | 0.051               | 0.869           | 0.009               | 0.804           | -0.013              |
| <i>CYP2C9</i>  | 3.31e-04        | -0.192              | 0.009           | -0.141              | 7.48e-04        | -0.181              | 2.52e-07        | -0.275              | 0.004           | -0.154              | 0.002           | -0.166              |
| <i>GYS2</i>    | 7.78e-09        | -0.305              | 1.21e-05        | -0.234              | 2.95e-04        | -0.194              | 1.10e-07        | -0.283              | 0.011           | -0.136              | 3.30e-07        | -0.273              |
| <i>MBL2</i>    | 1.86e-04        | -0.200              | 4.72e-05        | -0.218              | 0.291           | -0.057              | 1.81e-04        | -0.201              | 0.011           | -0.137              | 7.13e-04        | -0.183              |
| <i>PHYHD1</i>  | 5.79e-06        | -0.242              | 0.064           | -0.100              | 0.025           | -0.121              | 6.52e-05        | -0.215              | 0.078           | -0.095              | 0.009           | -0.142              |
| <i>SLC27A5</i> | 2.72e-12        | -0.365              | 1.59e-07        | -0.279              | 4.04e-12        | -0.362              | 2.16e-20        | -0.473              | 8.48e-12        | -0.357              | 6.15e-11        | -0.345              |
| <i>TTC36</i>   | 3.99e-12        | -0.363              | 3.10e-04        | -0.194              | 3.83e-07        | -0.270              | 3.00e-12        | -0.366              | 6.80e-06        | -0.240              | 1.29e-07        | -0.282              |

$p < 0.05$  and partial correlations  $< -0.3$  or  $> 0.3$  were considered to be statistically significant correlations.
