# Supplementary material for: Screening for Lipid-Metabolism-Related Genes and Identifying the Diagnostic Potential of ANGPTL6 for HBV-Related Early-Stage Hepatocellular Carcinoma
Source: MDPI journal article supplement (doi:10.3390/biom12111700), 2022-11-17
Supplement: s1 [file s1]

**Table S5.** Methylation analysis of 10 DEGs in LIHC by cBioPortal platform.

| Genes          | Correlation of Methylation Levels of Genes and Their mRNA Levels |
|----------------|------------------------------------------------------------------|
| <i>ADH4</i>    | Spearman: -0.24 ( $p = 2.89\text{e-}6$ )                         |
| <i>ANGPTL6</i> | Spearman: -0.28 ( $p = 3.43\text{e-}8$ )                         |
| <i>CLEC4G</i>  | Spearman: 0.03 ( $p = 0.629$ )                                   |
| <i>CLEC4M</i>  | Spearman: 0.16 ( $p = 1.69\text{e-}3$ )                          |
| <i>CYP2C9</i>  | Spearman: -0.58 ( $p = 5.82\text{e-}35$ )                        |
| <i>GYS2</i>    | Spearman: -0.53 ( $p = 2.87\text{e-}28$ )                        |
| <i>MBL2</i>    | Spearman: -0.46 ( $p = 1.49\text{e-}20$ )                        |
| <i>PHYHD1</i>  | Spearman: -0.71 ( $p = 2.13\text{e-}59$ )                        |
| <i>SLC27A5</i> | Spearman: -0.75 ( $p = 1.11\text{e-}68$ )                        |
| <i>TTC36</i>   | Spearman: -0.80 ( $p = 1.15\text{e-}85$ )                        |

*Abbreviations:* DEGs, differentially expressed genes; LIHC, liver hepatocellular carcinoma; *ADH4*, alcohol dehydrogenase 4 (class II), pi polypeptide; *ANGPTL6*, angiopoietin like 6; *CLEC4G*, C-type lectin domain family 4 member G; *CLEC4M*, C-type lectin domain family 4 member M; *CYP2C9*, cytochrome P450 family 2 subfamily C member 9; *GYS2*, glycogen synthase 2; *MBL2*, mannose binding lectin 2; *PHYHD1*, phytanoyl-CoA dioxygenase domain containing 1; *SLC27A5*, solute carrier family 27 member 5; *TTC36*, tetratricopeptide repeat domain 36.
