# Supplementary material for: Screening for Lipid-Metabolism-Related Genes and Identifying the Diagnostic Potential of ANGPTL6 for HBV-Related Early-Stage Hepatocellular Carcinoma
Source: MDPI journal article supplement (doi:10.3390/biom12111700), 2022-11-17
Supplement: s1 [file s1]

**Table S11.** Serum ANGPTL6 Levels for the Diagnosis of Early Primary HCC with normal serum AFP levels.

| Subjects                             | AUC   | 95% CI         | Sensitivity (%) | Specificity (%) | <i>p</i> -Value | The Cutoff Value of ANGPTL6 (pg/mL) |
|--------------------------------------|-------|----------------|-----------------|-----------------|-----------------|-------------------------------------|
| HCC Patients vs. The Noncancer Group | 0.717 | 0.614 to 0.805 | 50.00           | 91.94           | 0.0005          | 577.5                               |
| HCC Patients vs. CHB Patients        | 0.684 | 0.554 to 0.797 | 50.00           | 96.67           | 0.0118          | 574.5                               |
| HCC Patients vs. HCs                 | 0.747 | 0.623 to 0.847 | 84.37           | 59.38           | 0.0001          | 277.5                               |
