# Supplementary material for: Screening for Lipid-Metabolism-Related Genes and Identifying the Diagnostic Potential of ANGPTL6 for HBV-Related Early-Stage Hepatocellular Carcinoma
Source: MDPI journal article supplement (doi:10.3390/biom12111700), 2022-11-17
Supplement: s1 [file s1]

**Table S9.** Characteristics of early primary HCC patients and CHB patients with normal serum AFP levels.

| Characteristics                        | HCC Patients               | CHB patients              | <i>p</i> -Value |
|----------------------------------------|----------------------------|---------------------------|-----------------|
| Case                                   | 32                         | 30                        | -               |
| Age (years), Mean $\pm$ SD             | 61.22 $\pm$ 9.69           | 59.03 $\pm$ 10.57         | 0.399           |
| Male, <i>n</i> (%)                     | 29 (90.63)                 | 26 (86.67)                | 0.623           |
| Child-Push Class                       |                            |                           | 0.588           |
| A, <i>n</i> (%)                        | 30 (93.75)                 | 27 (90.00)                |                 |
| B, <i>n</i> (%)                        | 2 (6.25)                   | 3 (10.00)                 |                 |
| Cirrhosis, <i>n</i> (%)                | 23 (71.88)                 | 19 (63.33)                | 0.472           |
| HBsAg Positive, <i>n</i> (%)           | 32 (100)                   | 30 (100)                  | -               |
| HCV-Ab Positive, <i>n</i> (%)          | 0 (0)                      | 0 (0)                     | -               |
| HEV-IgM Positive, <i>n</i> (%)         | 0 (0)                      | 0 (0)                     | -               |
| BMI (kg/m <sup>2</sup> ), Median (IQR) | 24.25 (23.73 to 25.28)     | 24.00 (21.93 to 24.93)    | 0.078           |
| ALT (U/L), Median (IQR)                | 23.00 (14.25 to 31.50)     | 21.50 (16.50 to 35.00)    | 0.855           |
| AST (U/L), Median (IQR)                | 26.00 (20.25 to 31.75)     | 24.50 (14.75 to 32.50)    | 0.209           |
| TBIL ( $\mu$ mol/L), Median (IQR)      | 14.80 (10.15 to 20.03)     | 14.85 (10.40 to 23.43)    | 0.398           |
| ALB (g/L), Median (IQR)                | 42.80 (41.15 to 44.95)     | 41.90 (36.03 to 45.03)    | 0.324           |
| PT (sec), Median (IQR)                 | 11.55 (11.23 to 11.90)     | 11.30 (10.10 to 12.55)    | 0.313           |
| CREA ( $\mu$ mol/L), Median (IQR)      | 68.50 (59.25 to 79.50)     | 66.00 (63.50 to 74.50)    | 0.662           |
| AFP (ng/mL), Median (IQR)              | 3.16 (2.26 to 4.53)        | 2.46 (1.74 to 3.58)       | 0.053           |
| ANGPTL6 (pg/mL), Median (IQR)          | 582.10 (385.88 to 1309.13) | 421.78 (369.04 to 496.56) | 0.013           |

The CHB patients had a total of 11 CHB patients without cirrhosis and 19 HBV-related liver cirrhosis patients. *Abbreviation:* CHB, chronic hepatitis B.
