# Supplementary material for: Screening for Lipid-Metabolism-Related Genes and Identifying the Diagnostic Potential of ANGPTL6 for HBV-Related Early-Stage Hepatocellular Carcinoma
Source: Biomolecules. 2022 Nov 17;12(11):1700. doi: 10.3390/biom12111700 (PMC9687352; doi:10.3390/biom12111700)
Supplement: Supplementary file 1 [file biomolecules-12-01700-s001.zip › Table S1.xlsx]

## Sheet: Sheet1
Table S1. Four datasets from the GEO database.
Datasets	Platforms	Tumorous Tissue Samples (n)	Nontumorous Tissue Samples (n)
GSE102079	GPL570 [HG-U133_Plus_2] Affymetrix Human Genome U133 Plus 2.0 Array	91	91
GSE63898	GPL13667 [HG-U219] Affymetrix Human Genome U219 Array	228	168
GSE76427	GPL10558 Illumina HumanHT-12 V4.0 expression beadchip	52	52
GSE107170	GPL570 [HG-U133_Plus_2] Affymetrix Human Genome U133 Plus 2.0 Array	24	24
