# Supplementary material for: Screening for Lipid-Metabolism-Related Genes and Identifying the Diagnostic Potential of ANGPTL6 for HBV-Related Early-Stage Hepatocellular Carcinoma
Source: Biomolecules. 2022 Nov 17;12(11):1700. doi: 10.3390/biom12111700 (PMC9687352; doi:10.3390/biom12111700)
Supplement: Supplementary file 1 [file biomolecules-12-01700-s001.zip › Table S4.xlsx]

## Sheet: Sheet1
Table S4. Clinical characteristic information of eight HCC patients.
Patients	Gender	Age (years)	Diagnosis	BCLC Stage	Child-Pugh Class	Tumor Size (cm)	Tumor Number	Tumor location in Couinaud's Segment	Differentiation Degree	Etiology	Cirrhosis (Yes or No)	BMI (kg/m2)	AFP (ng/mL)	ALT (U/L)	AST (U/L)	TBIL (µmol/L)	ALB (g/L)	PT (sec)	CREA (µmol/L)	HBsAg	HBsAb	HBeAg	HBeAb	HBcAb	HCV-Ab	HEV-IgM
Patient#1	Male	48	HCC	Stage A	A	3×2×2	Single	VIII	Moderate	HBV	Yes	23.9	322	24	18	11.9	43.1	12	68	Positive	Negative	Positive	Negative	Positive	Negative	Negative
Patient#2	Male	55	HCC	Stage A	A	4×4×3.5	Single	V	Moderate	HBV	Yes	23.7	3.6	17	22	18.5	42.8	12.2	72	Positive	Negative	Negative	Positive	Positive	Negative	Negative
Patient#3	Female	60	HCC	Stage A	A	2×2×1.5	Single	III	Moderate	HBV	Yes	24.8	507	39	39	13.8	36.5	12.5	56	Positive	Negative	Negative	Positive	Positive	Negative	Negative
Patient#4	Male	59	HCC	Stage A	A	4.5×3.5×3.5	Single	VI	Poor	HBV	Yes	23.6	1.59	6	16	13.6	49.6	11.5	72	Positive	Negative	Positive	Negative	Positive	Negative	Negative
Patient#5	Male	43	HCC	Stage A	A	2×2×1.5	Single	II	Poor	HBV	Yes	24.6	180	22	26	5.4	39.8	11.4	60	Positive	Negative	Negative	Positive	Positive	Negative	Negative
Patient#6	Male	66	HCC	Stage A	A	4×4×3.5	Single	V	Moderate	HBV	Yes	24.3	31.2	25	24	14.2	45.8	10.6	80	Positive	Negative	Negative	Positive	Positive	Negative	Negative
Patient#7	Male	40	HCC	Stage A	A	11×7×8	Single	VIII	Poor	HBV	Yes	24.1	541	24	26	22.4	42.3	12.8	89	Positive	Negative	Positive	Negative	Positive	Negative	Negative
Patient#8	Male	55	HCC	Stage A	A	7×6×6	Single	VII	Poor	HBV	Yes	23.6	21377	15	27	13.9	48	11.3	94	Positive	Negative	Negative	Positive	Positive	Negative	Negative
Abbreviations: BMI, body-mass index; AFP, alpha-fetoprotein; ALT, alanine aminotransferase; AST, aspartate transaminase; TBIL, total bilirubin; ALB, albumin; PT, Prothrombin time; CREA, creatinine; HBsAg, hepatitis B virus surface antigen; HBsAb, hepatitis B virus surface antibody; HBeAg, hepatitis B virus e-antigen; HBeAb, hepatitis B virus e-antibody; HBcAb, hepatitis B virus core antibody; HCV…
