# Supplementary material for: Screening for Lipid-Metabolism-Related Genes and Identifying the Diagnostic Potential of ANGPTL6 for HBV-Related Early-Stage Hepatocellular Carcinoma
Source: Biomolecules. 2022 Nov 17;12(11):1700. doi: 10.3390/biom12111700 (PMC9687352; doi:10.3390/biom12111700)
Supplement: Supplementary file 1 [file biomolecules-12-01700-s001.zip › Table S12.xlsx]

## Sheet: Sheet1
Table S12. Comparison of serum lipoprotein subfraction levels in early-stage HCC patients and HCs.
Index	Description	Unit	HCC patients			HCs			p-Value (Mann-Whitney U test)
			Upper Quartile	Median	Lower Quartile	Upper Quartile	Median	Lower Quartile
TPCH	Total Cholesterol	mg/dL	158.19	186.58	204.69	191.06	242.77	300.93	0.001*
TPTG	Total Triglycerides	mg/dL	63.01	88.55	114.95	94.925	129.67	209.315	0.005*
LDCH	LDL-C	mg/dL	90.75	104.56	122.28	83.205	110.81	173.06	0.262
HDCH	HDL-C	mg/dL	36.6	46.73	56.29	48.595	61.56	69.725	0.004*
TPA1	Apo-A1	mg/dL	98.51	114.9	132.17	136.175	161.08	169.39	< 0.001*
TPA2	Apo-A2	mg/dL	20	23.47	24.73	27.175	35.21	38.315	< 0.001*
TPAB	Apo-B	mg/dL	73.79	79.89	91.22	78.16	109.9	140.775	0.008*
LDHD	LDL-C/HDL-C	-/-	1.86	2.24	2.51	1.605	1.96	2.59	0.223
ABA1	Apo-B/Apo-A1	-/-	0.62	0.68	0.83	0.545	0.73	0.85	0.838
TBPN	Total Particle Number	nmol/L	1341.63	1452.63	1658.58	1421.15	1998.33	2559.68	0.008*
VLPN	VLDL Particle Number	nmol/L	81.87	122.53	169.05	110.405	161.11	265.82	0.039*
IDPN	IDL Particle Number	nmol/L	49.72	67.95	118.04	74.145	101.69	116.835	0.069
LDPN	LDL Particle Number	nmol/L	1143.72	1246.45	1332.39	1172.91	1684.6	1995.49	0.073
L1PN	LDL-1 Particle Number	nmol/L	173.82	261.66	335.45	102.44	183.25	285.8	0.037*
L2PN	LDL-2 Particle Number	nmol/L	177.65	251.76	294.8	66.865	125.54	202.71	0.019*
L3PN	LDL-3 Particle Number	nmol/L	193.87	237.47	281.95	95.595	222.98	292.945	0.329
L4PN	LDL-4 Particle Number	nmol/L	129.93	178.06	237.43	143.75	242.99	397.55	0.099
L5PN	LDL-5 Particle Number	nmol/L	87.87	127.08	170.6	240.245	277.13	409.7	< 0.001*
L6PN	LDL-6 Particle Number	nmol/L	109.8	161.49	219.33	316.98	431.45	657	< 0.001*
IDTG	IDL Triglycerides	mg/dL	1.04	3.05	6.61	5.835	9.51	21.545	0.001*
LDTG	LDL Triglycerides	mg/dL	13.45	16.45	23.8	15.305	23.51	29.7	0.138
HDTG	HDL Triglycerides	mg/dL	6.39	7.61	12.63	5.805	8.93	14.575	0.588
VLTG	VLDL Triglycerides	mg/dL	32.2	47.43	59.07	75.45	93.68	130.965	< 0.001*
VLCH	VLDL Cholesterol	mg/dL	9.76	12.95	20.3	15.52	21.35	50.47	0.007*
IDCH	IDL Cholesterol	mg/dL	6.8	10.09	15.47	10.52	16.94	21.19	0.026*
VLFC	VLDL Free Cholesterol	mg/dL	4.29	6.74	8.93	7.945	10.17	18.3	0.001*
IDFC	IDL Free Cholesterol	mg/dL	1.85	2.7	4.22	3.03	4.78	6.34	0.015*
LDFC	LDL Free Cholesterol	mg/dL	32.54	35.59	41.08	26.945	36.43	54.66	0.571
HDFC	HDL Free Cholesterol	mg/dL	10.66	13.63	15.03	13.645	16.67	19.28	0.012*
VLPL	VLDL Phospholipids	mg/dL	9.87	14.71	17.75	17.62	21.72	33.22	< 0.001*
IDPL	IDL Phospholipids	mg/dL	3.12	3.95	5.45	7.725	9.99	15.995	< 0.001*
LDPL	LDL Phospholipids	mg/dL	57.03	62.65	68.05	50.27	60.81	94.99	0.588
HDPL	HDL Phospholipids	mg/dL	55.5	60.15	77.62	69.975	74.64	91.505	0.006*
HDA1	HDL Apo-A1	mg/dL	97.98	113.51	131.39	132.695	157.5	172.315	< 0.001*
HDA2	HDL Apo-A2	mg/dL	21.28	23.81	25.14	27.84	34.83	38.07	< 0.001*
VLAB	VLDL Apo-B	mg/dL	4.5	6.74	9.3	6.075	8.86	14.62	0.039*
IDAB	IDL Apo-B	mg/dL	2.73	3.74	6.49	4.075	5.59	6.425	0.069
LDAB	LDL Apo-B	mg/dL	62.9	68.55	73.28	64.505	92.65	109.745	0.073
V1TG	VLDL-1 Triglycerides	mg/dL	9.39	16.62	24.38	24.64	45.14	57.505	< 0.001*
V2TG	VLDL-2 Triglycerides	mg/dL	5.74	8.94	10.38	14.93	17.74	32.685	< 0.001*
V3TG	VLDL-3 Triglycerides	mg/dL	4.49	7.59	9.93	12.38	17.14	29.09	< 0.001*
V4TG	VLDL-4 Triglycerides	mg/dL	4.37	5.86	6.96	7.305	9.23	14.445	< 0.001*
V5TG	VLDL-5 Triglycerides	mg/dL	2.25	2.58	3.05	1.57	1.78	2.215	0.001*
V1CH	VLDL-1 Cholesterol	mg/dL	2.39	3.67	6.63	3.15	6.74	17.53	0.044*
V2CH	VLDL-2 Cholesterol	mg/dL	1.64	1.95	3.8	2.9	3.79	10.41	0.001*
V3CH	VLDL-3 Cholesterol	mg/dL	1.33	2.29	3.54	4.225	5.53	11.845	< 0.001*
V4CH	VLDL-4 Cholesterol	mg/dL	2.24	3.18	4.95	3.805	4.35	8.27	0.008*
V5CH	VLDL-5 Cholesterol	mg/dL	0.67	0.97	1.5	0	0.45	0.77	0.007*
V1FC	VLDL-1 Free Cholesterol	mg/dL	0.27	0.85	1.59	1.295	2.43	5.97	0.002*
V2FC	VLDL-2 Free Cholesterol	mg/dL	0.68	1	1.6	1.27	1.75	4.46	0.004*
V3FC	VLDL-3 Free Cholesterol	mg/dL	0.53	1.01	1.67	1.78	2.15	4.995	< 0.001*
V4FC	VLDL-4 Free Cholesterol	mg/dL	1.08	1.62	2.61	1.95	2.38	4.39	0.008*
V5FC	VLDL-5 Free Cholesterol	mg/dL	0.3	0.49	0.82	0	0	0.005	< 0.001*
V1PL	VLDL-1 Phospholipids	mg/dL	1.24	2.45	3.67	3.015	7.74	11.205	< 0.001*
V2PL	VLDL-2 Phospholipids	mg/dL	1.55	2.06	2.59	3.61	4.47	8.62	< 0.001*
V3PL	VLDL-3 Phospholipids	mg/dL	1.45	2.26	3.57	4.05	5.15	9.69	< 0.001*
V4PL	VLDL-4 Phospholipids	mg/dL	2.31	3.13	4.25	3.82	4.17	6.99	0.003*
V5PL	VLDL-5 Phospholipids	mg/dL	1.22	1.52	2.01	0.535	1.18	1.58	0.071
L1TG	LDL-1 Triglycerides	mg/dL	3.77	5.28	9.45	1.825	3.06	8.5	0.089
L2TG	LDL-2 Triglycerides	mg/dL	2.07	2.98	3.94	1.255	2.01	3.09	0.037*
L3TG	LDL-3 Triglycerides	mg/dL	2.22	2.52	3.31	0.735	1.19	2.225	< 0.001*
L4TG	LDL-4 Triglycerides	mg/dL	1.7	2.49	3.34	2.005	3.35	4.49	0.283
L5TG	LDL-5 Triglycerides	mg/dL	1.12	1.56	3.2	1.81	4.11	5.085	0.025*
L6TG	LDL-6 Triglycerides	mg/dL	2.3	3.05	4.22	4.43	6.58	7.875	< 0.001*
L1CH	LDL-1 Cholesterol	mg/dL	16.26	26.99	33.61	8.54	16.34	31.52	0.047*
L2CH	LDL-2 Cholesterol	mg/dL	16.45	22.31	27.74	3.785	11.76	20.56	0.025*
L3CH	LDL-3 Cholesterol	mg/dL	16	22.37	25.73	7.45	19.97	27.29	0.448
L4CH	LDL-4 Cholesterol	mg/dL	11.97	14.63	18.04	11.4	21.71	35.31	0.069
L5CH	LDL-5 Cholesterol	mg/dL	4.81	9.07	12.49	16.715	22.69	32.045	< 0.001*
L6CH	LDL-6 Cholesterol	mg/dL	7.15	11.19	15.48	22.685	31.08	43.23	< 0.001*
L1FC	LDL-1 Free Cholesterol	mg/dL	5.33	7.92	10.15	4.135	5.75	10.235	0.152
L2FC	LDL-2 Free Cholesterol	mg/dL	4.8	6.83	8.36	3.26	5.3	7.13	0.155
L3FC	LDL-3 Free Cholesterol	mg/dL	5.38	6.93	8	3.925	7.45	9.215	0.942
L4FC	LDL-4 Free Cholesterol	mg/dL	4.02	4.86	5.65	4.835	6.97	10.435	0.011*
L5FC	LDL-5 Free Cholesterol	mg/dL	2.31	3.44	4.1	5.125	6.23	9.67	< 0.001*
L6FC	LDL-6 Free Cholesterol	mg/dL	2.36	3.25	4.44	6.75	8.75	12.255	< 0.001*
L1PL	LDL-1 Phospholipids	mg/dL	9.64	14.82	18.84	5.36	9.38	16.28	0.037*
L2PL	LDL-2 Phospholipids	mg/dL	9.48	12.73	15.1	3.54	7.2	11.39	0.022*
L3PL	LDL-3 Phospholipids	mg/dL	9.54	12.01	14.13	4.685	11.04	14.685	0.329
L4PL	LDL-4 Phospholipids	mg/dL	6.88	8.53	10.26	6.635	11.86	18.545	0.094
L5PL	LDL-5 Phospholipids	mg/dL	3.42	5.35	7	9.25	11.59	17.15	< 0.001*
L6PL	LDL-6 Phospholipids	mg/dL	5.26	7.23	8.78	12.855	16.97	23.48	< 0.001*
L1AB	LDL-1 Apo-B	mg/dL	9.56	14.39	18.45	5.63	10.08	15.715	0.037*
L2AB	LDL-2 Apo-B	mg/dL	9.77	13.85	16.21	3.675	6.9	11.145	0.019*
L3AB	LDL-3 Apo-B	mg/dL	10.66	13.06	15.51	5.255	12.26	16.11	0.329
L4AB	LDL-4 Apo-B	mg/dL	7.15	9.79	13.06	7.905	13.36	21.865	0.099
L5AB	LDL-5 Apo-B	mg/dL	4.83	6.99	9.38	13.215	15.24	22.535	< 0.001*
L6AB	LDL-6 Apo-B	mg/dL	6.04	8.88	12.06	17.43	23.73	36.135	< 0.001*
H1TG	HDL-1 Triglycerides	mg/dL	1.9	3.34	5.12	1.6	2.88	5.16	0.99
H2TG	HDL-2 Triglycerides	mg/dL	1.02	1.54	2.45	0.9	1.71	2.565	0.709
H3TG	HDL-3 Triglycerides	mg/dL	1.04	1.28	2.19	0.92	1.39	2.59	0.555
H4TG	HDL-4 Triglycerides	mg/dL	1.42	2.29	2.88	1.395	3.15	4.21	0.185
H1CH	HDL-1 Cholesterol	mg/dL	10.77	15.15	23.1	16.4	19.53	24.005	0.109
H2CH	HDL-2 Cholesterol	mg/dL	5.97	7.23	9.44	8.24	9.48	12.01	0.014*
H3CH	HDL-3 Cholesterol	mg/dL	6.61	7.48	8.67	9.58	10.23	12.475	< 0.001*
H4CH	HDL-4 Cholesterol	mg/dL	9.64	12.25	15.4	13.36	22.05	25.425	0.002*
H1FC	HDL-1 Free Cholesterol	mg/dL	3.35	4.47	6.04	4.71	6.05	7.77	0.014*
H2FC	HDL-2 Free Cholesterol	mg/dL	1.5	2.08	2.51	2.27	2.5	3.295	0.006*
H3FC	HDL-3 Free Cholesterol	mg/dL	1.39	1.77	2.21	1.945	2.64	3.5	0.001*
H4FC	HDL-4 Free Cholesterol	mg/dL	2.1	2.79	3.45	3.615	5.22	5.955	< 0.001*
H1PL	HDL-1 Phospholipids	mg/dL	12.31	17.44	29.46	17.225	22	27.625	0.419
H2PL	HDL-2 Phospholipids	mg/dL	8.41	11.31	14.56	10.825	13.1	16.885	0.129
H3PL	HDL-3 Phospholipids	mg/dL	11.09	11.8	13.85	13.65	14.49	19.435	< 0.001*
H4PL	HDL-4 Phospholipids	mg/dL	15.04	19.33	20.2	21.38	26.95	31.71	< 0.001*
H1A1	HDL-1 Apo-A1	mg/dL	14.53	20.35	39.55	20.495	25.62	36.96	0.329
H2A1	HDL-2 Apo-A1	mg/dL	10.94	12.29	15.93	11.87	14.84	18.355	0.155
H3A1	HDL-3 Apo-A1	mg/dL	17.13	19.82	22.56	23.295	26.78	30.96	< 0.001*
H4A1	HDL-4 Apo-A1	mg/dL	41.6	52.08	59.45	60.935	85.65	92.08	< 0.001*
H1A2	HDL-1 Apo-A2	mg/dL	1.1	1.8	3.24	1.27	1.7	2.875	0.952
H2A2	HDL-2 Apo-A2	mg/dL	2.08	2.56	3.25	1.905	2.8	4.07	0.329
H3A2	HDL-3 Apo-A2	mg/dL	3.94	4.88	5.44	5.41	6.26	8.345	< 0.001*
H4A2	HDL-4 Apo-A2	mg/dL	9.59	12.68	14.37	14.2	22.32	23.63	0.001*
*p < 0.05 (2-sided) was considered statistically significant.
Abbreviations: HCC, hepatocellular carcinoma; HCs, healthy controls.
